# Supplementary material for: Discovery of the Oncogenic Parp1, a Target of bcr-abl and a Potential Therapeutic, in mir-181a/PPFIA1 Signaling Pathway
Source: PubMed Central journal article supplement (PMC6393709; doi:10.1016/j.omtn.2019.01.015), 2019-02-08
Supplement: mmc1.pdf [file mmc1.pdf]

**OMTN, Volume 16**

## **Supplemental Information**

### **Discovery of the Oncogenic Parp1, a Target of bcr-abl and a Potential Therapeutic, in mir-181a/PPF1A1 Signaling Pathway**

**Chunming Gu, Yanjun Liu, Zhao Yin, Juhua Yang, Guiping Huang, Xuejiao Zhu, Yumin Li, and Jia Fei**

**Supplemental Information**  
**Supplemental Figures and Legends**

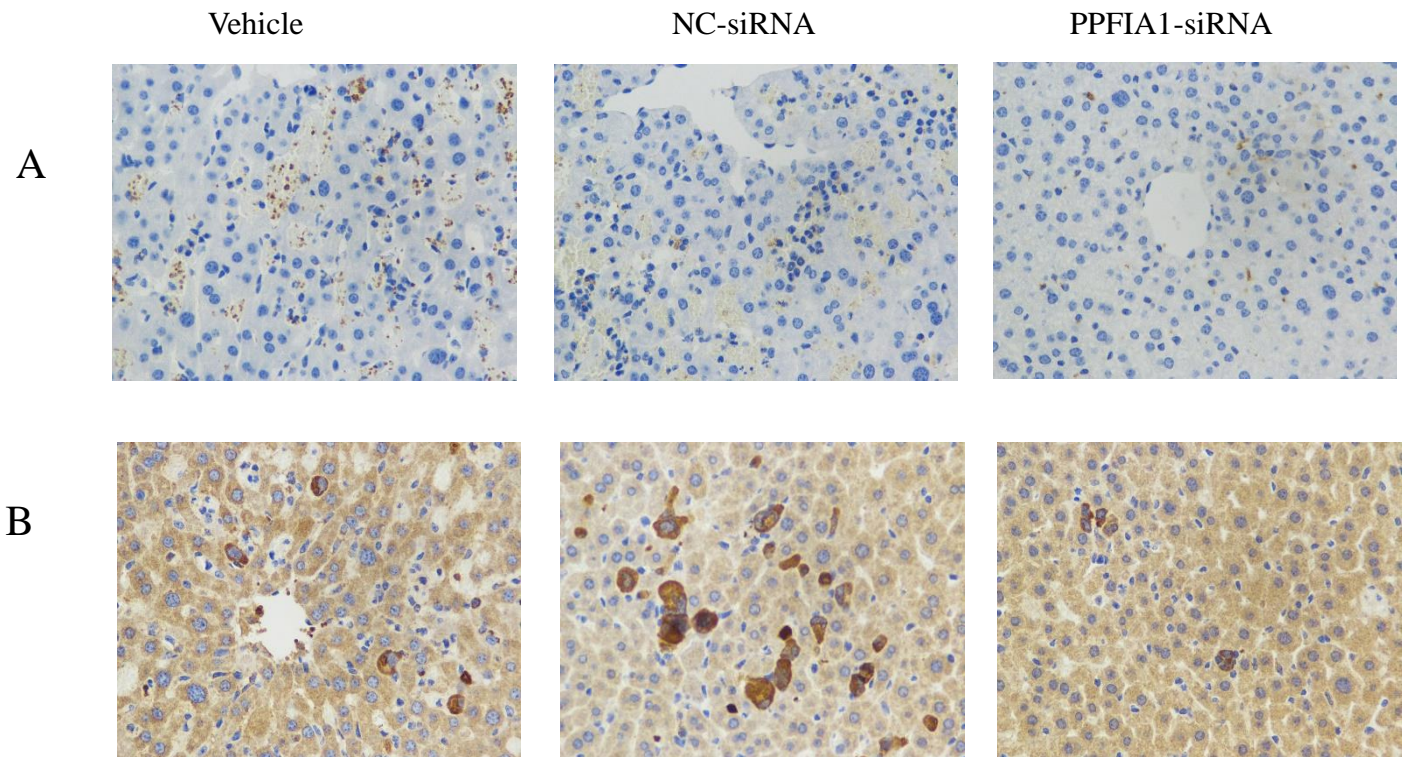

Figure S1. Immunohistochemical (IHC) analysis of liver samples from mice engrafted with K562-Luciferase cells untreated, NC-treated, and PPFIA1-siRNA-treated using anti-PPFIA1 (A) and anti-PARP1 (B) antibodies. Untreated and NC-treated mice were also used as controls.

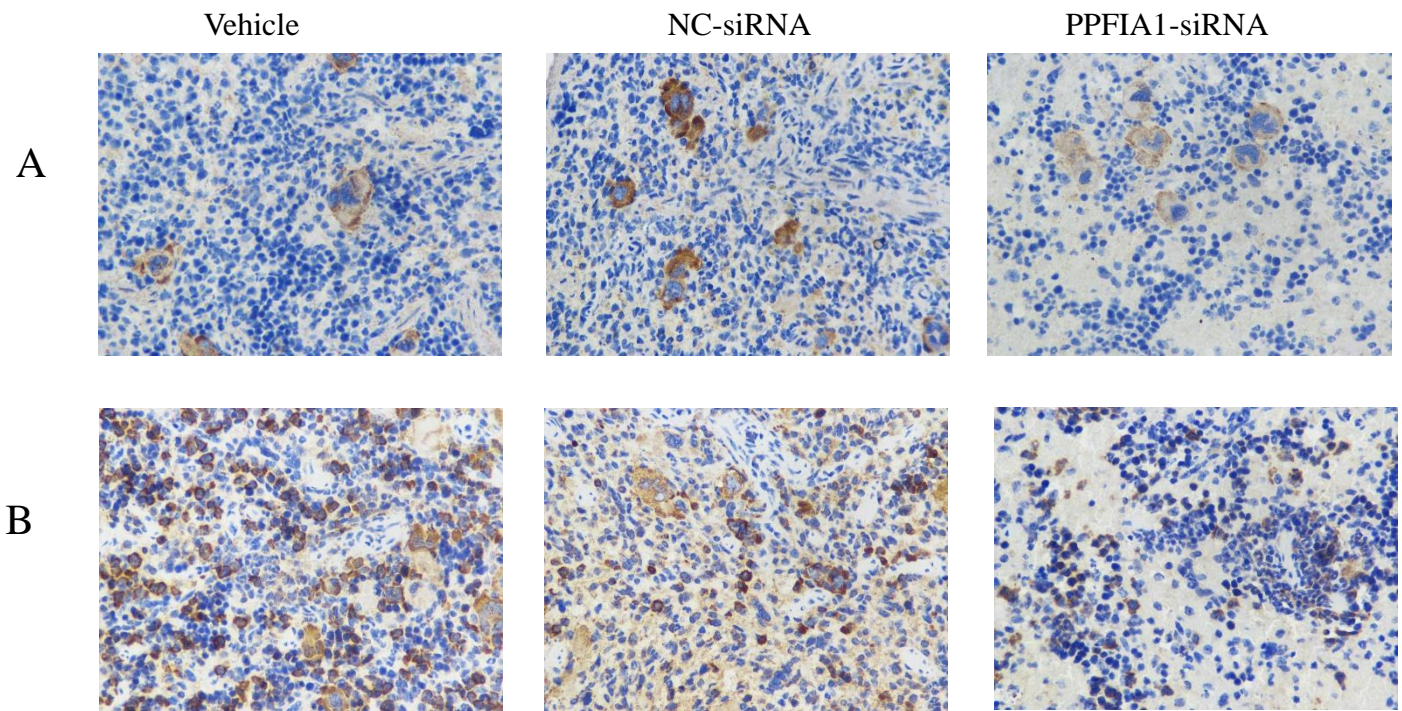

Figure S2. Immunohistochemical (IHC) analysis of spleens from mice engrafted with K562-Luciferase cells untreated, NC-treated, and PPFIA1-siRNA-treated using anti-PPFIA1 (A) and anti-PARP1 (B) antibodies. Untreated and NC-treated mice were also used as controls.

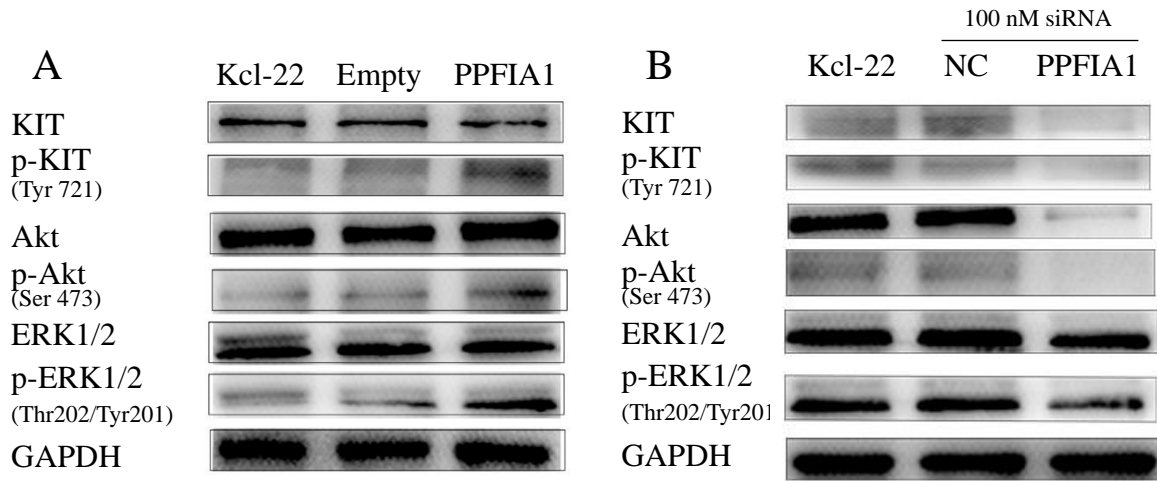

Figure S3. The effect of PPFIA1 on KIT signaling pathway.

(A) Overexpression of PPFIA1 increased the expression of phosphotylated KIT, Akt and ERK1/2 proteins in Kcl-22 cells. (B) Transfection of PPFIA1-siRNA for 48h attenuated the expression of phosphotylated KIT, Akt and ERK1/2 proteins in Kcl-22 cells.

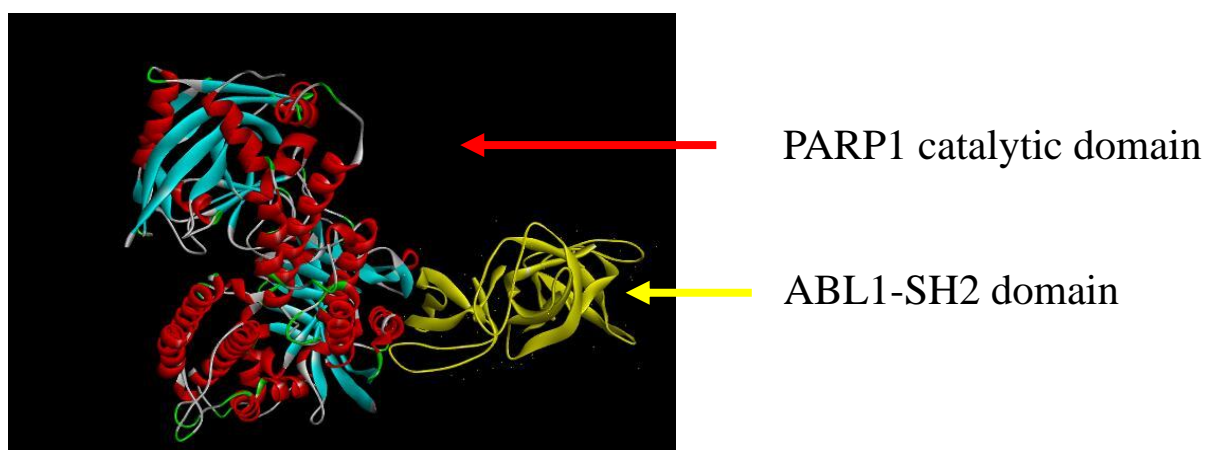

Figure S4. Docking of the PARP1 catalytic domain and the ABL1-SH2 domain.

**Supplemental Tables****Table S1.** Antibodies

| REAGENT or RESOURCE             | Supplier                  | IDENTIFIER     |
|---------------------------------|---------------------------|----------------|
| Antibodies                      |                           |                |
| Anti-GAPDH                      | Cell Signaling Technology | Cat# sc-74470  |
| Anti-PPFIA1                     | Abcam                     | Cat# ab-96377  |
| Anti-PPFIA1                     | Santa Cruz Biotechnology  | Cat# sc-398030 |
| Anti-C-KIT                      | Santa Cruz Biotechnology  | Cat# sc-17806  |
| Anti-p-C-KIT (Tyr 721)          | Santa Cruz Biotechnology  | Cat# sc-101659 |
| Anti-PARP1                      | Santa Cruz Biotechnology  | Cat# sc-74470  |
| Anti-PARP                       | Cell Signaling Technology | Cat# 9532S     |
| Anti-BCR                        | Abcam                     | Cat# ab-86173  |
| Anti-c-Abl                      | Santa Cruz Biotechnology  | Cat# sc-23     |
| Anti-AKT                        | Cell Signaling Technology | Cat# 4691S     |
| Anti-p-AKT (Ser 473)            | Cell Signaling Technology | Cat# 4060S     |
| Anti-ERK1/2                     | Cell Signaling Technology | Cat# 4695S     |
| Anti-p-ERK1/2 (Thr 202/Thr 201) | Cell Signaling Technology | Cat# 9101S     |
| Anti-rabbit IgG, HRP-linked     | Cell Signaling Technology | Cat# 7074S     |
| Anti-rabbit IgG, HRP-linked     | Cell Signaling Technology | Cat# 7076S     |
| Anti-P65                        | Santa Cruz Biotechnology  | Cat# sc-514451 |
| Anti-p-P65 (Ser 536)            | Santa Cruz Biotechnology  | Cat# sc-136548 |
| Anti-FLAG                       | Sigma Aldrich             | Cat# F1804     |

**Table S2.** Cell Lines

| Cell lines        | SOURCE                                 |
|-------------------|----------------------------------------|
| K562              | Institute of Shanghai cell biology     |
| 293T              |                                        |
| KCL-22            | Laboratory of Professor Markus Muschen |
| EM2               |                                        |
| Jurl-MK1          |                                        |
| B-luciferase K562 | Beijing Biocytogen Co., Ltd.           |

**Table S3.** Experimental models

| Experimental Model           | SOURCE                                                   |
|------------------------------|----------------------------------------------------------|
| Balb/c nu: female<br>C57BL/6 | Institute of laboratory animal science, JINAN University |
| B-NDG@(B-NSGTM) mice         | Beijing Biocytogen Co., Ltd.                             |

**Table S4.** Chemicals, recombinant proteins, and plasmids

| Chemicals, Recombinant proteins, Plasmids | SOURCE          | IDENTIFIER    |
|-------------------------------------------|-----------------|---------------|
| Imatinib Mesylate (STI571)                | Selleck.cn      | S1026         |
| Olaparib                                  | Selleck.cn      | S1060         |
| PARP1 protein                             | Sino biological | 11040-H08B-20 |
| Anti-Flag Affinity Gel                    | Bimake          | B23101        |
| Psi-CHECK-2                               | Promega         | C8021         |
| PSI-CHECK-PPFIA1-3'UTR                    | This paper      | N/A           |
| PSI-CHECK-PPFIA1-MUT-3'UTR                | This paper      | N/A           |
| LP-X0107-lv201-C0010                      | GeneCopoeia     | N/A           |
| LP-NEG-lv201-C0010                        | GeneCopoeia     | N/A           |
| LPP-X0107-Lv181-400                       | GeneCopoeia     | N/A           |
| LPP-NEG-Lv181-400                         | GeneCopoeia     | N/A           |
| EX-Z8307-Lv202                            | GeneCopoeia     | N/A           |
| EX-NEG-Lv202                              | GeneCopoeia     | N/A           |
| EX-Z4808-Lv201                            | GeneCopoeia     | N/A           |
| EX-NEG-Lv201                              | GeneCopoeia     | N/A           |



**Table S5.** Oligonucleotides

| Oligonucleotide       | Sequence<br>(5' to 3')          | SOURCE                                    |
|-----------------------|---------------------------------|-------------------------------------------|
| miR-181a mimic        |                                 | Guangzhou<br>RiboBio Co.,<br>Ltd.         |
| sense                 | AACAUUCAACGCUGUCGGUGAGU         |                                           |
| antisense             | UCACCGACAGCGUUGAAUGUUGU         |                                           |
| PPFIA1-siRNA          |                                 | Guangzhou<br>RiboBio Co.,<br>Ltd.         |
| Sense                 | CCACAAAGCUCUGGAUGAAdTdT         |                                           |
| Antisense             | dTdTGGUGUUUCGAGACCUACUU         |                                           |
| Scramble duplex, SCR  |                                 | Guangzhou<br>RiboBio Co.,<br>Ltd.         |
| Sense                 | UUCUCCGAACGUGUCACGUTT           |                                           |
| Antisense             | ACGUGACACGUUCGGAGAATT           |                                           |
| <i>PPFIA1</i> primers |                                 | Sangon Biotech<br>(Shanghai) Co.,<br>Ltd. |
| Forward               | GCTTVAGTTAACCTTTTTTCATGTATATCCA |                                           |
| Reverse               | TCGACAGTTAACATAAACGTAAAATCCTT   |                                           |
| <i>GAPDH</i> Primers  |                                 | Sangon Biotech<br>(Shanghai) Co.,<br>Ltd. |
| Forward               | CAACGGATTGGTTCGTATT             |                                           |
| Reverse               | CACAGTCTTCTGGGTGGC              |                                           |
| <i>KIT</i> Primers    |                                 | Sangon Biotech<br>(Shanghai) Co.,<br>Ltd. |
| Forward               | CAATGGCACGGTTGAATGTA            |                                           |
| Reverse               | AAGGAGTGAACAGGGTGTGG            |                                           |
| <i>PARP1</i> Primers  |                                 | Sangon Biotech<br>(Shanghai) Co.,<br>Ltd. |
| Forward               | CCGCATACTCCATCCTCAGT            |                                           |
| Reverse               | GCTTCTTCATCCCAAAGTCG            |                                           |
| <i>P65</i> Primers    |                                 | Sangon Biotech<br>(Shanghai) Co.,<br>Ltd. |

Forward

GGAGCACAGATACCACCAAGA

Reverse

CGGCAGTCCTTTCCTACAAG

---

## **Supplemental Methods**

### **Immunohistochemical staining and image analysis**

The slides were deparaffinised and rehydrated following the manufacturer's instructions. Endogenous peroxidase activity was abolished by 3% H<sub>2</sub>O<sub>2</sub>, antigen retrieval was conducted in citrate buffer. Slices were incubated with a primary antibody (anti-PARP1 or PPFIA1 at 1:50 dilution) at 4 °C overnight, followed by incubation with a HRP-labeled secondary antibody for 30 min. Images were obtained by a Leica DMRI microscope installed on a Lexica DC500 camera (Leica).
